# Supplementary material for: Radical-Driven Methane Formation in Humans Evidenced by Exogenous Isotope-Labeled DMSO and Methionine
Source: MDPI journal article supplement (doi:10.3390/antiox12071381), 2023-07-04

## ***Supplementary Material***

**Frank Keppler<sup>1,2\*</sup>, Mihály Boros<sup>3</sup>, Daniela Polag<sup>1</sup>**

<sup>1</sup>Institute of Earth Sciences, Heidelberg University, D-69120 Heidelberg, Germany

<sup>2</sup>Heidelberg Center for the Environment (HCE), Heidelberg University, D-69120 Heidelberg, Germany

<sup>3</sup>Institute of Surgical Research, University of Szeged, H-6724 Szeged, Hungary

\*Correspondence: frank.keppler@geow.uni-heidelberg.de

### **Time frame of experiments**

**Table S1: Overview and timeline of isotope labeling experiments.**

| <b>experimental series</b>               | <b>date</b>             |
|------------------------------------------|-------------------------|
| oral intake <sup>13</sup> C labeled DMSO | 06/14/2018              |
| oral intake <sup>2</sup> H labeled DMSO  | 10/12/2020 – 10/13/2020 |
| arm incubation                           | 07/17/2018 – 07/19/2018 |
| blood experiments                        | 07/03/2019 – 07/05/2019 |

### **Determination of stable isotope source signatures of CH<sub>4</sub> using keeling plots**

The Keeling plot was first used to estimate the  $\delta^{13}\text{C}$  value of respired CO<sub>2</sub> in an ecosystem from night-time air samples. The basis of the Keeling plot method is conservation of mass. Thus, in our case the concentration of CH<sub>4</sub> in breath air and adjacent atmospheric air (inhaled air) reflects the combination of background atmospheric concentration and the variable amounts of that gas added by sources in the human body.

$$c_a = c_b + c_s \text{ (S1)}$$

where  $c_a$ ,  $c_b$ , and  $c_s$  are, respectively, the breath (exhaled air) CH<sub>4</sub> concentration measured from the volunteer (Fig. S1A), the background CH<sub>4</sub> concentration (inhaled air) and the additional

concentration component produced in the human body which has raised atmospheric CH<sub>4</sub> concentration above background.

Given conservation of mass,

$$\delta^{13}\text{C}_a c_a = \delta^{13}\text{C}_b c_b + \delta^{13}\text{C}_s c_s \text{ (S2)}$$

where  $\delta^{13}\text{C}$  represents the stable carbon isotope value of each CH<sub>4</sub> component. Combining equations (S1) and (S2),

$$\delta^{13}\text{C}_a = c_b(\delta^{13}\text{C}_b - \delta^{13}\text{C}_s) (1/c_a) + \delta^{13}\text{C}_s \text{ (S3)}$$

where  $\delta^{13}\text{C}_s$  is the integrated value of the CH<sub>4</sub> sources in the human body. This is illustrated graphically in Figure S1 with breath samples from the volunteer that were collected over a period of four weeks.

The extrapolated intercept of the straight line in the Keeling plot corresponds to the situation when the concentration is very large and dominated by sample CH<sub>4</sub> ( $1/[\text{CH}_4] = 0$ ) and thus provides the isotope ratio of the breath CH<sub>4</sub> source. The Keeling plot of isotopic composition versus inverse concentration  $1/[\text{CH}_4]$  as shown for the volunteer in Figure S1B, yielded a very good linear correlation ( $R^2 > 0.96$ ) and the  $\delta^{13}\text{C}$  source signature of  $-76 \pm 0.93$  mUr was derived by extrapolating to  $\text{CH}_4 \rightarrow \infty$  which corresponds to the y-axis intercept of the linear fit to the  $\delta^{13}\text{C}$  values versus  $1/[\text{CH}_4]$  data.

The same principle as explained before for stable carbon isotopes was also applied for determining the source signature of stable hydrogen isotopes of breath CH<sub>4</sub> and a  $\delta^2\text{H}$  source signature of  $-356 \pm 5.5$  mUr was calculated (Fig. S2).

It is important to recognize that the model described by equations (S1) to (S3) involves two basic assumptions. Firstly, we assume that a simple mixing of only two gas components is considered (a source and the bulk background). Secondly, we assume that the isotope ratio of these two components does not change over the course of the observation.

(A)

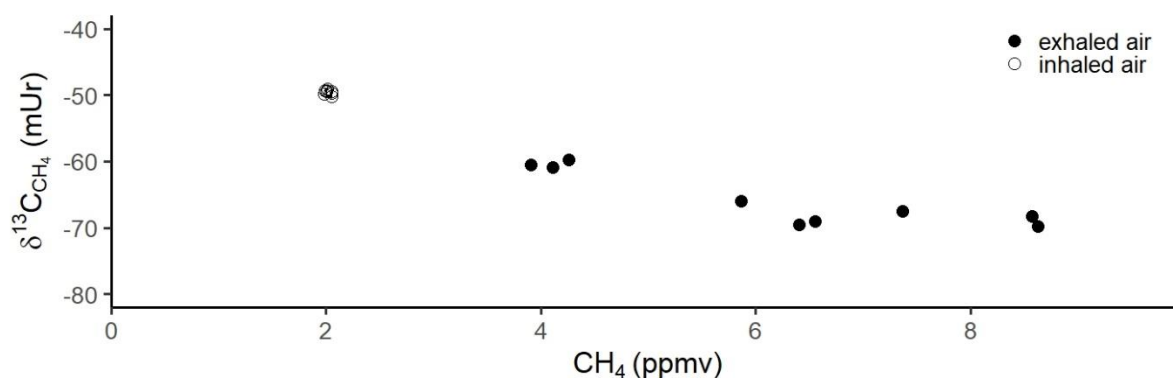

(B)

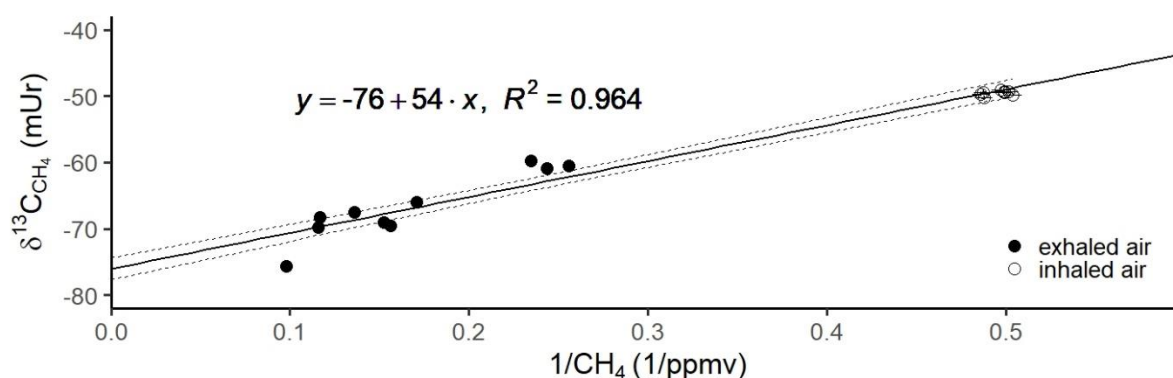

**Supplementary Figure S1:** (A) Relationship between breath  $\text{CH}_4$  concentration and stable carbon isotope values of the subject of breath samples collected within the period of July to August 2019. (B) The keeling plot shows the linear regression between  $1/\text{CH}_4$  and  $\delta^{13}\text{C}_{\text{CH}_4}$  values including the 95% confidence band of the regression line. The standard errors for the linear regression are 0.93 mUr for the intercept and 2.6 mUr for the slope.

(A)

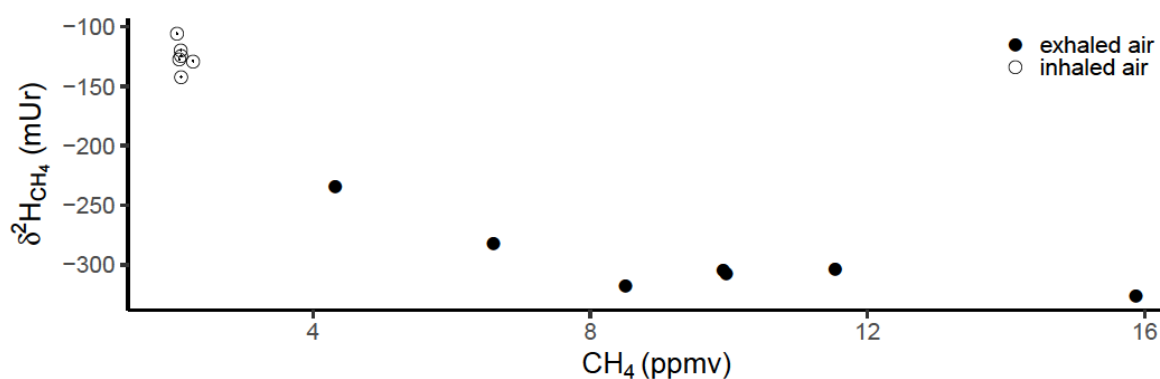

(B)

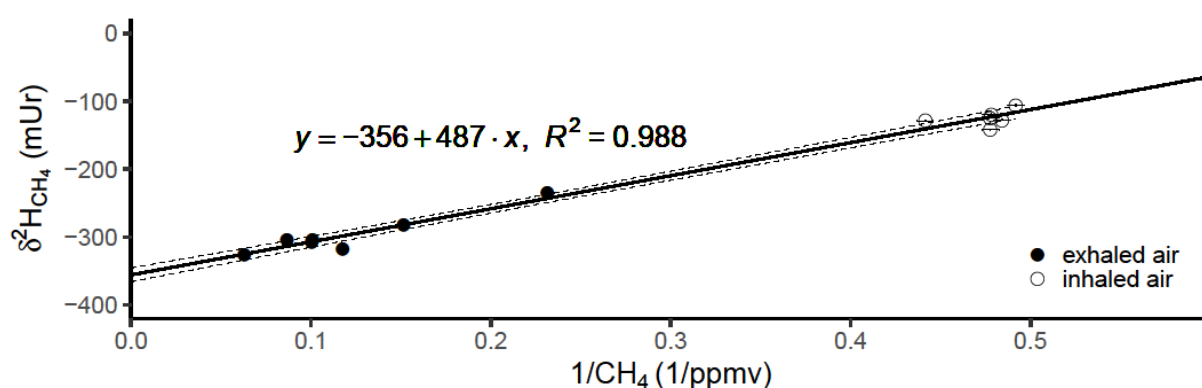

**Supplementary Figure S2:** (A) Relationship between breath  $\text{CH}_4$  concentration and stable hydrogen isotope values of the subject of breath samples collected within the period of July to August 2019. (B) The keeling plot shows the linear regression between  $1/\text{CH}_4$  and  $\delta^2\text{H}_{\text{CH}_4}$  including the 95% confidence band of the regression line. The standard errors for the linear regression are 5.5 mUr for the intercept and 16.2 mUr for the slope.

**Supplementary photo S1:** Arm incubation chamber for online measurements using CRDS

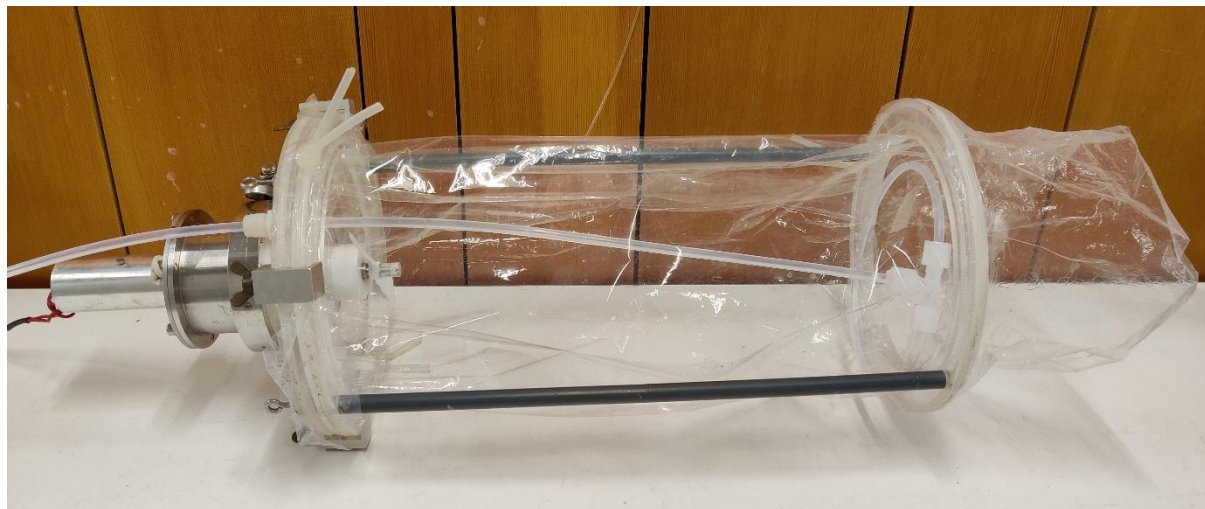

Supplement: s1 [file s1]
